# Supplementary material
Source: PubMed Central journal article supplement (PMC7808410)
Supplement: NIHMS1647309-supplement-1.pdf [file NIHMS1647309-supplement-1.pdf]

**A “Build and Retrieve” methodology to simultaneously solve cryo-EM structures of a variety of membrane proteins**

Chih-Chia Su<sup>1,Ψ</sup>, Meinan Lyu<sup>1,Ψ</sup>, Christopher E. Morgan<sup>1,Ψ</sup>, Jani Reddy Bolla<sup>2</sup>, Carol V. Robinson<sup>2</sup> and Edward W. Yu<sup>1,\*</sup>

<sup>1</sup>Department of Pharmacology, Case Western Reserve University School of Medicine, Cleveland, OH 44106, USA.

<sup>2</sup>Department of Chemistry, University of Oxford, South Parks Road, Oxford, OX1 3QZ, UK.

<sup>Ψ</sup>C.S., M.L. and C.E.M. contributed equally to this work.

\*To whom correspondence should be addressed. Email: [edward.w.yu@case.edu](mailto:edward.w.yu@case.edu)

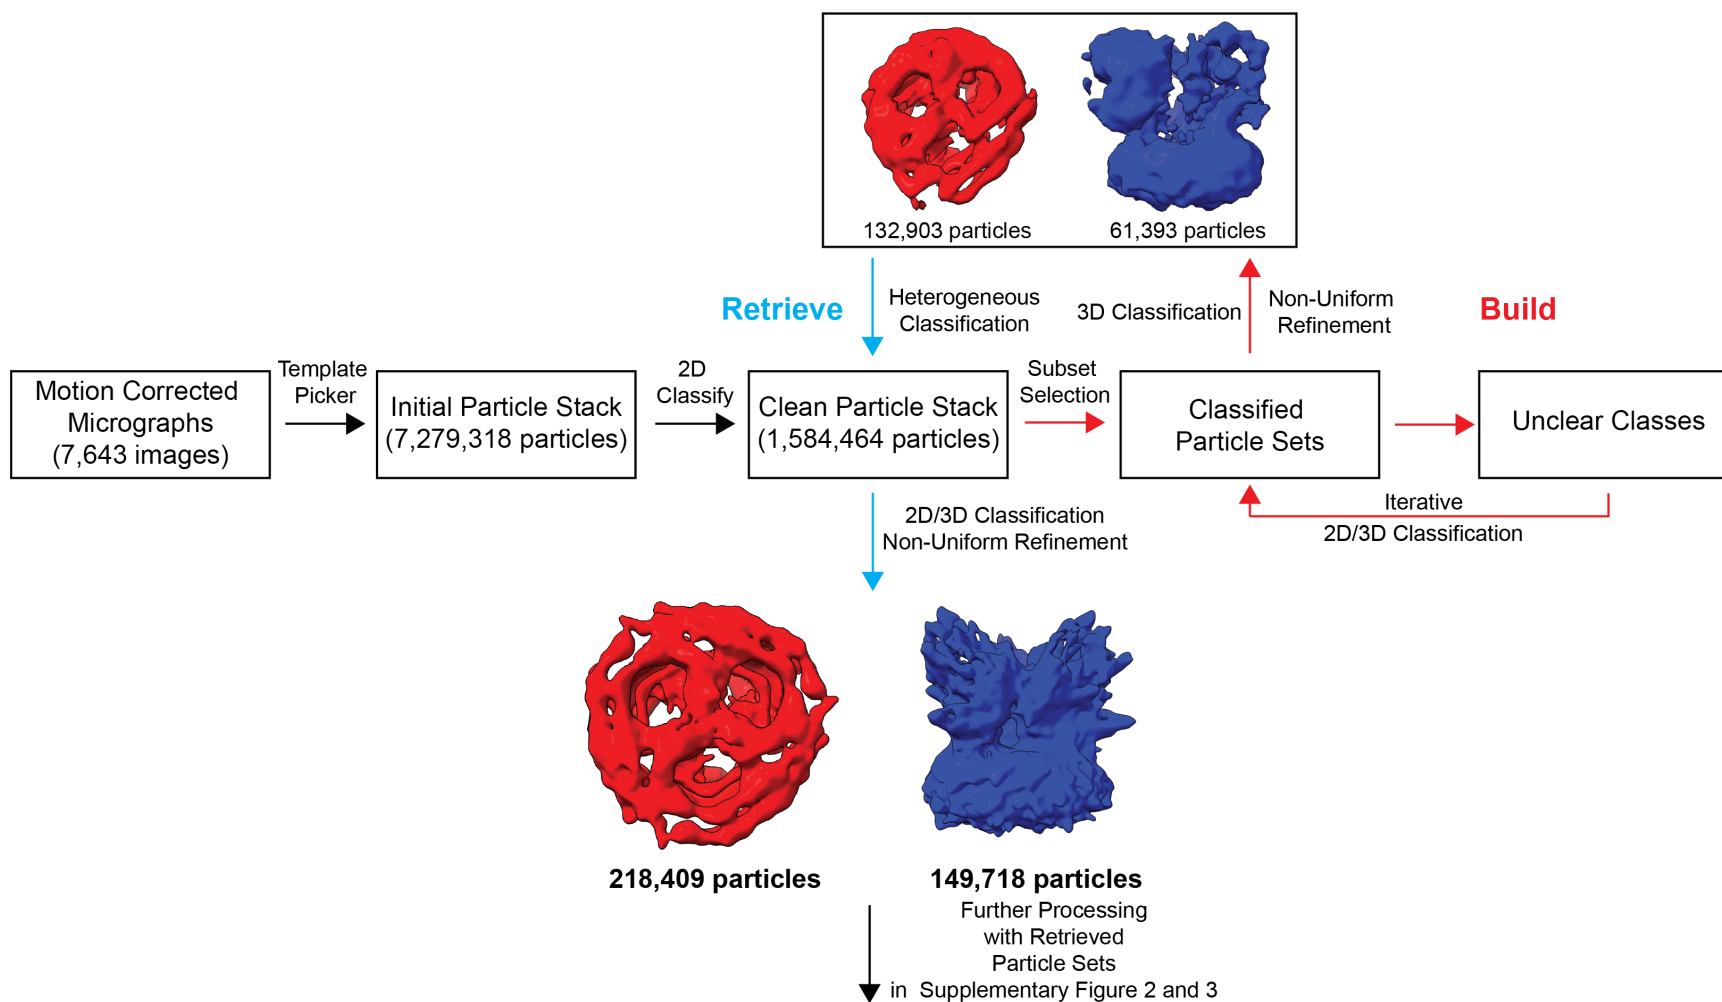

**Supplementary Figure 1.** Flowchart of the “Build and Retrieve” (BaR) iterative method.

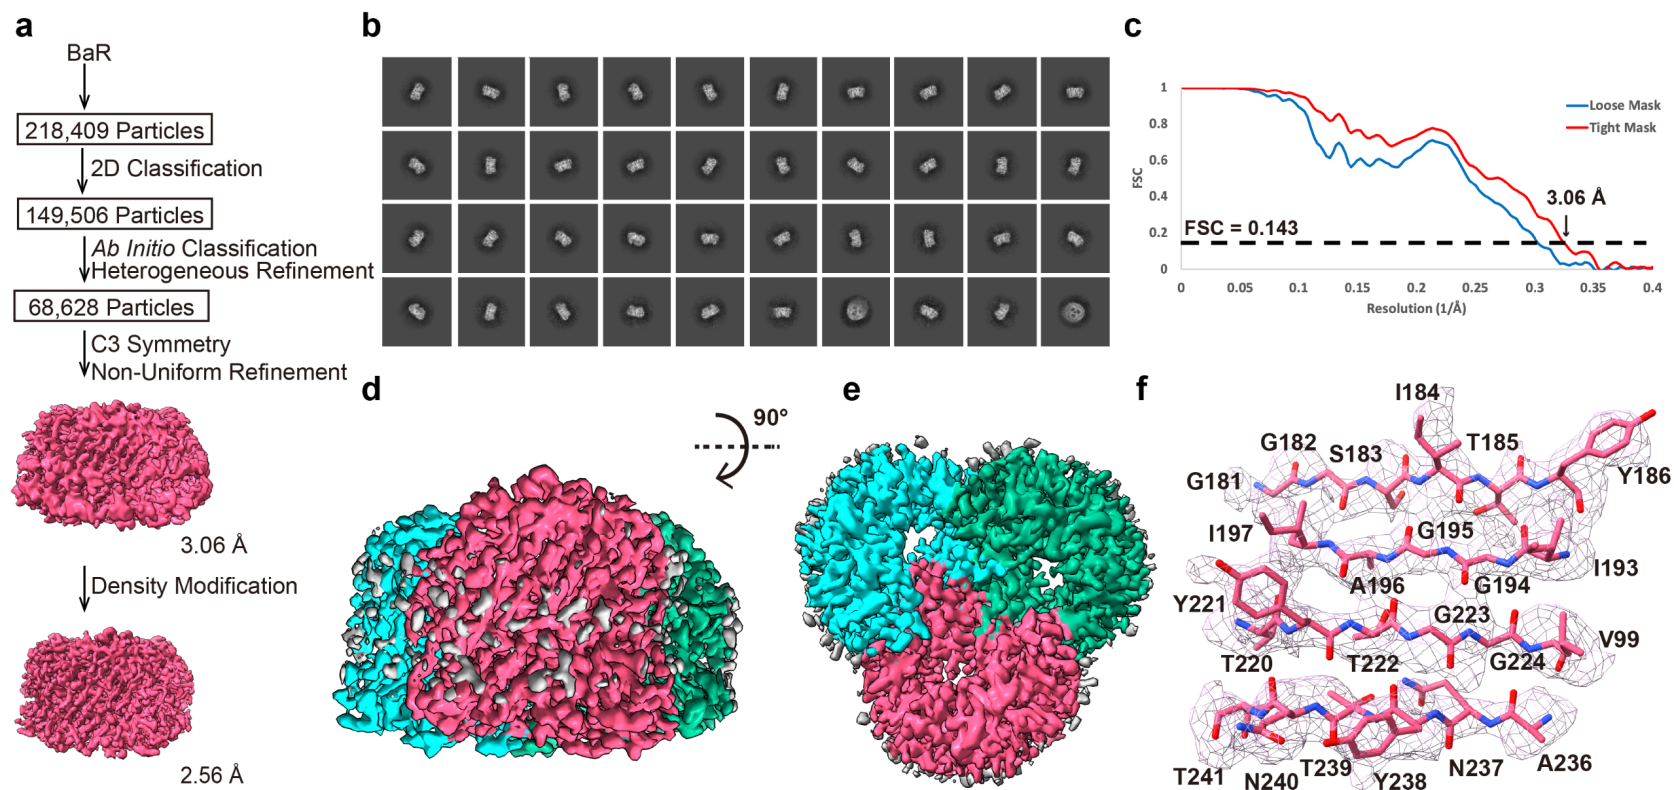

**Supplementary Figure 2.** Cryo-EM analysis of the *E. coli* OmpC porin channel. (a) BaR processing flowchart. (b) Representative 2D classes. (c) Fourier Shell Correlation (FSC) curves. (d) Sharpened cryo-EM map of the OmpC porin viewed in the membrane plane and from the periplasmic side. (e) Sharpened cryo-EM map of the OmpC viewed from the exterior side. (f) Local EM density map of OmpC.

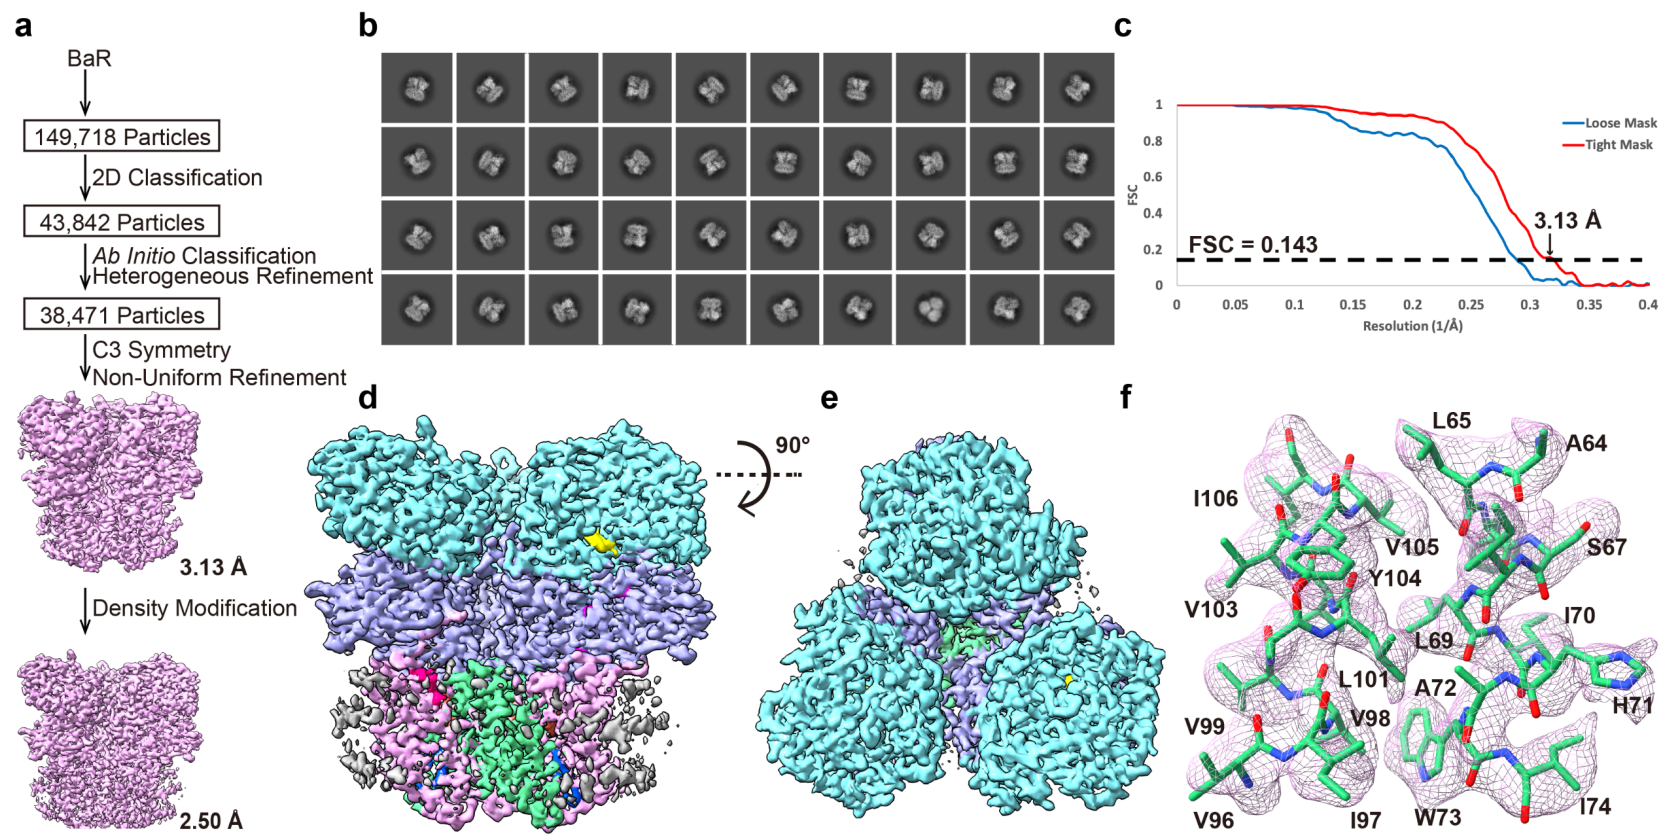

**Supplementary Figure 3.** Cryo-EM analysis of the *E. coli* SQR complex. (a) BaR processing flowchart. (b) Representative 2D classes. (c) Fourier Shell Correlation (FSC) curves. (d) Sharpened cryo-EM map of the SQR complex viewed in the membrane plane. (e) Sharpened cryo-EM map of the SQR complex viewed from the cytoplasmic side. (f) Local EM density map of SQR.



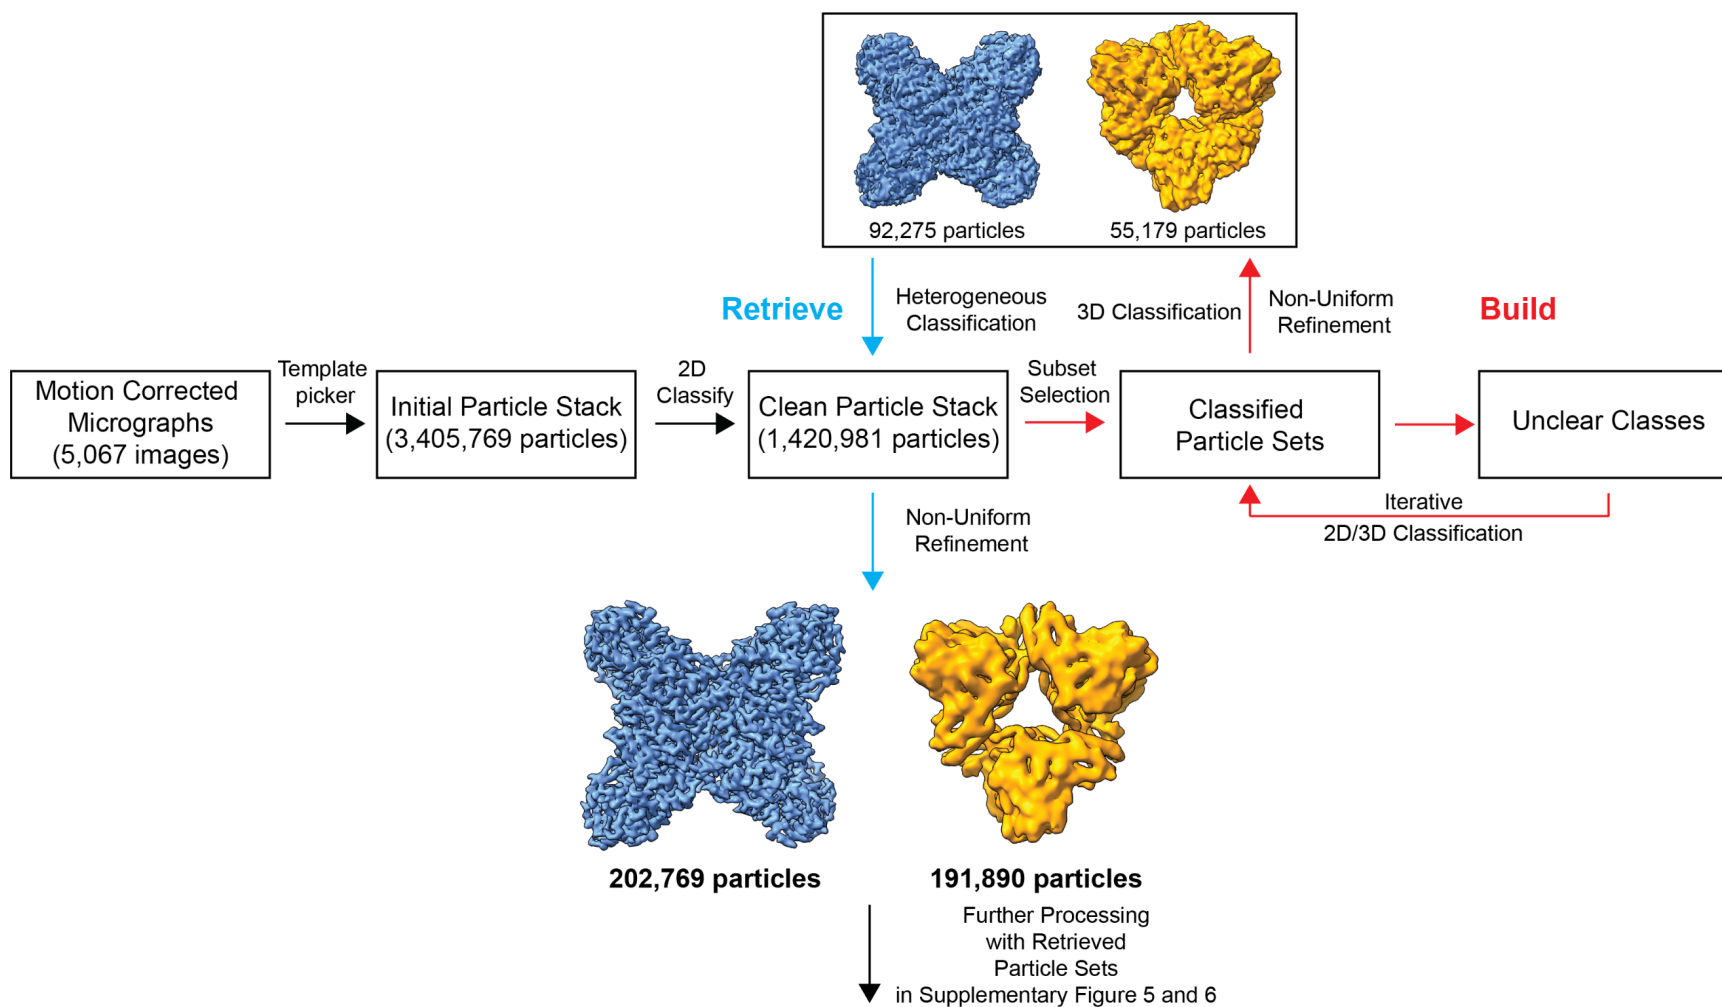

**Supplementary Figure 4.** Flowchart of the “Build and Retrieve” (BaR) iterative method.

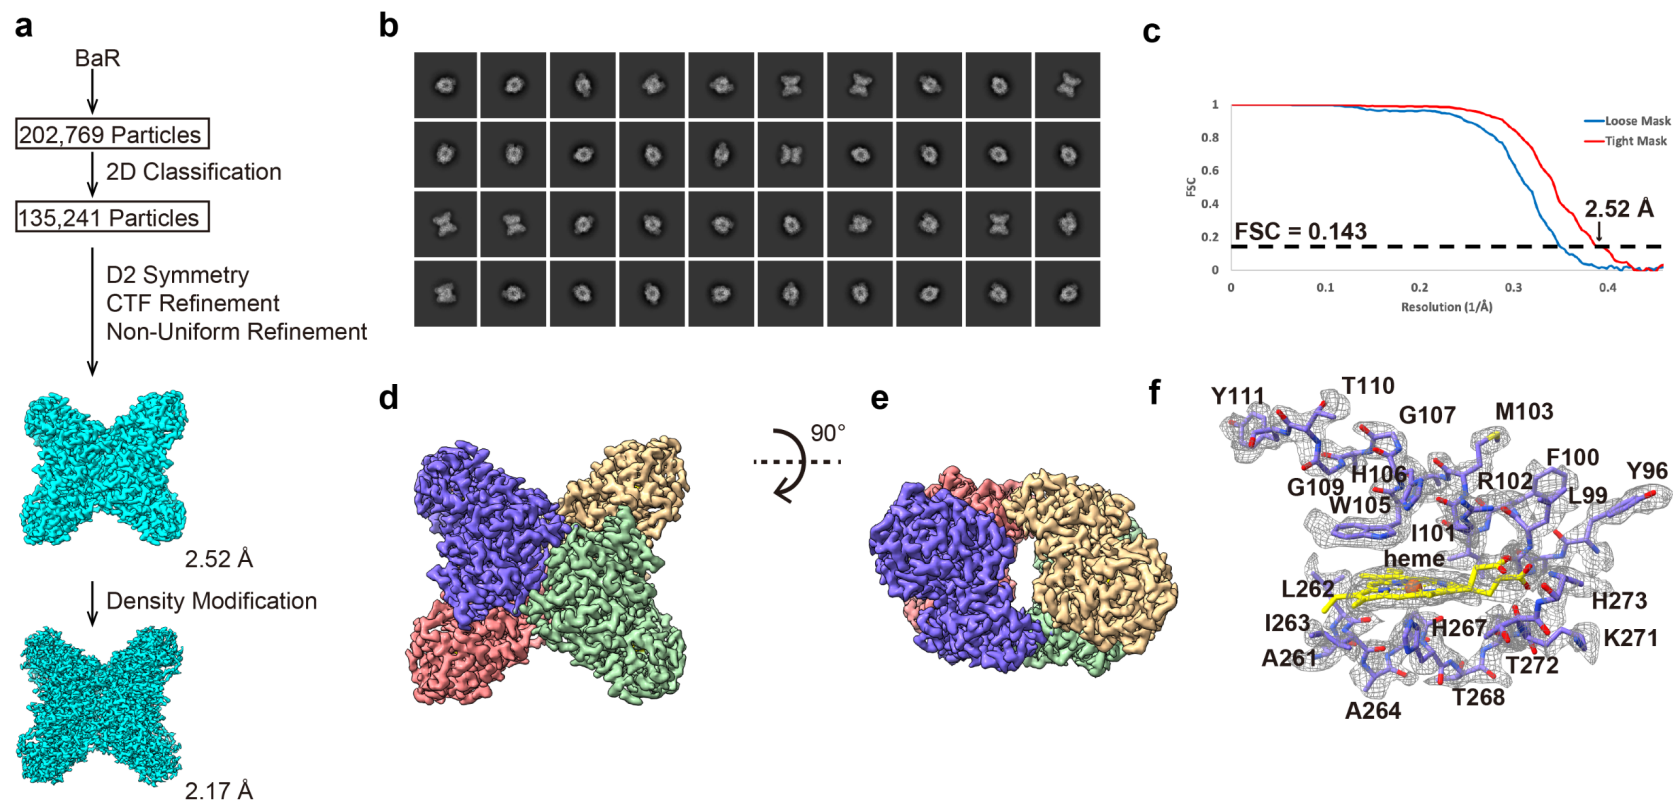

**Supplementary Figure 5.** Cryo-EM analysis of the *E. coli* KatG complex. (a) BaR processing flowchart. (b) Representative 2D classes. (c) Fourier Shell Correlation (FSC) curves. (d) Sharpened cryo-EM map of the KatG complex. (e) Sharpened cryo-EM map of the KatG complex rotated 90° compared with the orientation of (d). (f) Local EM density map of KatG.

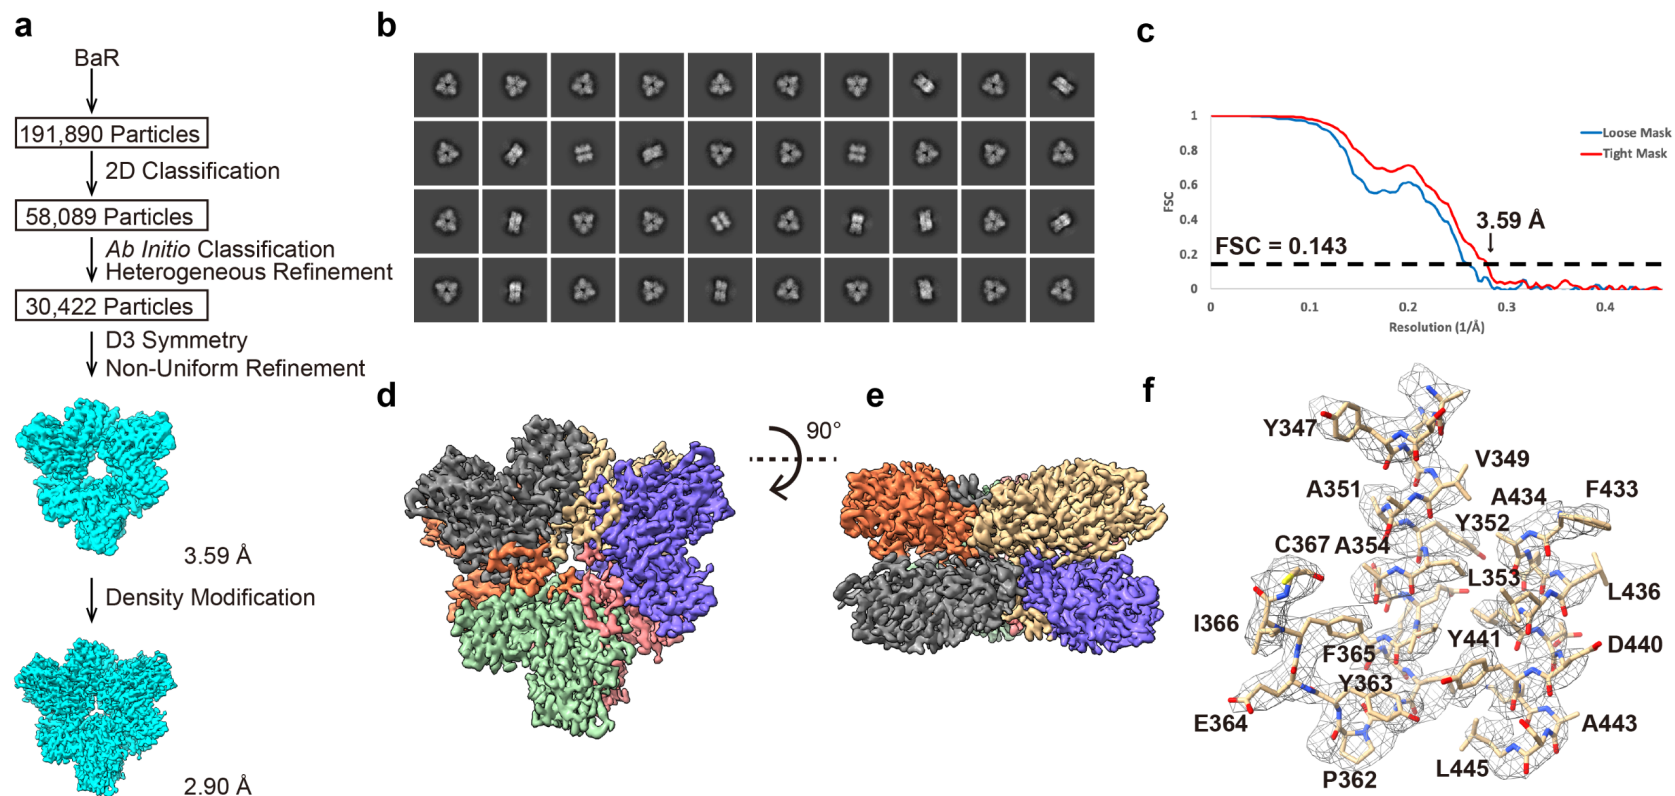

**Supplementary Figure 6.** Cryo-EM analysis of the *E. coli* GadB complex. (a) BaR processing flowchart. (b) Representative 2D classes. (c) Fourier Shell Correlation (FSC) curves. (d) Sharpened cryo-EM map of the GadB complex. (e) Sharpened cryo-EM map of the GadB complex rotated 90° compared with the orientation of (d). (f) Local EM density map of GadB.

**Supplementary Table 1. Cryo-EM data collection, processing, and refinement statistics.**

| Data set                                      | Proteins from the BpHpnN sample reconstituted in nanodiscs (1E3D1) |              |        |        |
|-----------------------------------------------|--------------------------------------------------------------------|--------------|--------|--------|
|                                               | Cytochrome b <sub>03</sub>                                         | BpHpnN       | OmpF   | SQR    |
| <b>Data collection and processing</b>         |                                                                    |              |        |        |
| Magnification                                 |                                                                    | 81,000       |        |        |
| Voltage (kV)                                  |                                                                    | 300          |        |        |
| Electron Microscope                           |                                                                    | Krios-GIF-K3 |        |        |
| Defocus range (μm)                            |                                                                    | -1.0 to -2.5 |        |        |
| Total exposure time (s)                       |                                                                    | 3.2          |        |        |
| Energy filter width (eV)                      |                                                                    | 20           |        |        |
| Pixel size (Å)                                |                                                                    | 1.08         |        |        |
| Total dose (e <sup>-</sup> /Å <sup>2</sup> )  |                                                                    | 50           |        |        |
| Number of frames                              |                                                                    | 40           |        |        |
| Does rate (e <sup>-</sup> /phys. Pixel/s)     |                                                                    | 18.2         |        |        |
| No. of initial micrographs                    |                                                                    | 13,093       |        |        |
| No. of initial particles                      |                                                                    | 9,955,108    |        |        |
| No. of final particles                        | 334,222                                                            | 63,910       | 43,793 | 12,706 |
| Symmetry                                      | C1                                                                 | C1           | C3     | C3     |
| GSFSC Resolution (Å)                          | 2.38                                                               | 4.04         | 3.15   | 4.06   |
| FSC threshold (0.143)                         |                                                                    |              |        |        |
| Density modification resolution <sup>41</sup> | 2.20                                                               | 3.59         | 2.54   | 3.60   |
| <b>Refinement</b>                             |                                                                    |              |        |        |
| Model resolution cut-off (Å)                  | 2.20                                                               | 3.59         | 2.54   | 3.60   |
| Model composition                             |                                                                    |              |        |        |
| No. of Protein residues                       | 1,207                                                              | 854          | 1,020  | 2,784  |
| No. ligands                                   | 14                                                                 | 0            | 0      | 18     |
| RMSD <sup>a</sup>                             |                                                                    |              |        |        |
| Bond lengths (Å)                              | 0.009                                                              | 0.003        | 0.004  | 0.006  |
| Bond angles (°)                               | 1.611                                                              | 0.634        | 0.834  | 0.836  |
| <b>Validation</b>                             |                                                                    |              |        |        |
| MolProbity score                              | 2.54                                                               | 1.94         | 2.96   | 2.48   |
| Ramachandran plot (%)                         |                                                                    |              |        |        |
| Favored (%)                                   | 95.50                                                              | 94.00        | 93.49  | 86.52  |
| Allowed (%)                                   | 4.50                                                               | 6.00         | 6.51   | 13.48  |
| Disallowed (%)                                | 0                                                                  | 0            | 0      | 0      |
| CC <sup>b</sup> Mask                          | 0.74                                                               | 0.64         | 0.70   | 0.63   |

<sup>a</sup>root mean square deviation

<sup>b</sup>correlation coefficient

**Supplementary Table 2. Cryo-EM data collection, processing, and refinement statistics.**

| Data set                                        | <i>E. coli</i> K12 membrane proteins reconstituted in nanodiscs (1E3D1) |              |
|-------------------------------------------------|-------------------------------------------------------------------------|--------------|
|                                                 | OmpC                                                                    | SQR          |
| <b>Data collection and processing</b>           |                                                                         |              |
| Magnification                                   |                                                                         | 81,000       |
| Voltage (kV)                                    |                                                                         | 300          |
| Electron Microscope                             |                                                                         | Krios-GIF-K3 |
| Defocus range ( $\mu\text{m}$ )                 |                                                                         | -1.0 to -2.5 |
| Total exposure time (s)                         |                                                                         | 4.2          |
| Energy filter width (eV)                        |                                                                         | None         |
| Pixel size ( $\text{\AA}$ )                     |                                                                         | 1.08         |
| Total dose ( $\text{e}^-/\text{\AA}^2$ )        |                                                                         | 40           |
| Number of frames                                |                                                                         | 42           |
| Dose rate ( $\text{e}^-/\text{phys. Pixel/s}$ ) |                                                                         | 11.97        |
| No. of initial micrographs                      |                                                                         | 7,643        |
| No. of initial particles                        |                                                                         | 7,279,318    |
| No. of final particles                          | 68,628                                                                  | 38,471       |
| Symmetry                                        | C3                                                                      | C3           |
| GSFSC Resolution ( $\text{\AA}$ )               | 3.06                                                                    | 3.13         |
| FSC threshold (0.143)                           |                                                                         |              |
| Density modification resolution <sup>41</sup>   | 2.56                                                                    | 2.50         |
| <b>Refinement</b>                               |                                                                         |              |
| Model resolution cut-off ( $\text{\AA}$ )       | 2.56                                                                    | 2.50         |
| Model composition                               |                                                                         |              |
| No. of Protein residues                         | 1,038                                                                   | 2,871        |
| No. ligands                                     | 0                                                                       | 18           |
| RMSD <sup>a</sup>                               |                                                                         |              |
| Bond lengths ( $\text{\AA}$ )                   | 0.002                                                                   | 0.002        |
| Bond angles ( $^\circ$ )                        | 0.570                                                                   | 0.427        |
| <b>Validation</b>                               |                                                                         |              |
| MolProbity score                                | 1.89                                                                    | 1.75         |
| Ramachandran plot (%)                           |                                                                         |              |
| Favored (%)                                     | 94.38                                                                   | 96.44        |
| Allowed (%)                                     | 5.62                                                                    | 3.56         |
| Disallowed (%)                                  | 0                                                                       | 0            |
| CC <sup>b</sup> Mask                            | 0.64                                                                    | 0.73         |

<sup>a</sup>root mean square deviation

<sup>b</sup>correlation coefficient



**Supplementary Table 3. Proteomic analysis of the *E. coli* K12 cell membrane.**

\*please note that OmpC was not present in the top 25 list

| Uniprot ID Fasta header                                             | Peptides | Sequence coverage [%] | Mol. weight [kDa] | Score    | Intensity | iBAQ     | MS/MS count |
|---------------------------------------------------------------------|----------|-----------------------|-------------------|----------|-----------|----------|-------------|
| P0ADB7 ECNB_ECOLI Entericidin B                                     | 1        | 39.6                  | 4.8095            | 296.09   | 8.23E+09  | 4.11E+09 | 5           |
| P0ADB1 OSME_ECOLI Osmotically-inducible putative lipoprotein OsmE   | 4        | 27.7                  | 12.021            | 114.43   | 5.6E+09   | 1.12E+09 | 15          |
| P0ABA0 ATPF_ECOLI ATP synthase subunit b                            | 13       | 49.4                  | 17.264            | 272.28   | 9.74E+09  | 9.74E+08 | 49          |
| P0ABJ9 CYDA_ECOLI Cytochrome bd-I ubiquinol oxidase subunit 1       | 20       | 22.6                  | 58.204            | 323.31   | 1.38E+10  | 8.61E+08 | 48          |
| P00363 FRDA_ECOLI Fumarate reductase flavoprotein subunit           | 27       | 38.7                  | 65.971            | 323.31   | 2.82E+10  | 8.53E+08 | 62          |
| P0ABB4 ATPB_ECOLI ATP synthase subunit beta                         | 35       | 80                    | 50.325            | 323.31   | 1.84E+10  | 7.67E+08 | 94          |
| P0ABB0 ATPA_ECOLI ATP synthase subunit alpha                        | 43       | 65.3                  | 55.221            | 323.31   | 2.06E+10  | 7.37E+08 | 91          |
| P65292 YGDI_ECOLI Uncharacterized lipoprotein YgdI                  | 2        | 36                    | 8.1741            | 71.771   | 2.86E+09  | 7.14E+08 | 7           |
| P0ADZ7 YAJC_ECOLI Sec translocon accessory complex subunit YajC     | 4        | 37.3                  | 11.887            | 38.796   | 2.85E+09  | 7.12E+08 | 8           |
| P64581 YQJD_ECOLI Uncharacterized protein YqjD                      | 5        | 65.3                  | 11.051            | 174.4    | 2.61E+09  | 6.52E+08 | 19          |
| P0AC47 FRDB_ECOLI Fumarate reductase iron-sulfur subunit            | 7        | 39.3                  | 27.123            | 235.32   | 6.35E+09  | 6.35E+08 | 13          |
| P36672 PTTBC_ECOLI PTS system trehalose-specific EIIBC component    | 9        | 14.2                  | 51.08             | 46.31    | 5.95E+09  | 5.95E+08 | 14          |
| P0A6E6 ATPE_ECOLI ATP synthase epsilon chain                        | 4        | 23.7                  | 15.068            | 250.24   | 1.87E+09  | 4.68E+08 | 15          |
| P11349 NARH_ECOLI Respiratory nitrate reductase 1 beta chain        | 32       | 53.7                  | 58.066            | 323.31   | 1.22E+10  | 4.54E+08 | 70          |
| P07014 SDHB_ECOLI Succinate dehydrogenase (SQR) iron-sulfur subunit | 6        | 20.6                  | 26.77             | 39.201   | 6.92E+09  | 4.33E+08 | 14          |
| P0ADW3 YHCB_ECOLI Inner membrane protein YhcB                       | 13       | 72                    | 14.961            | 323.31   | 3.76E+09  | 4.17E+08 | 31          |
| P63235 GADC_ECOLI Probable glutamate/gamma-aminobutyrate antiporter | 3        | 6.5                   | 55.076            | 211.68   | 4.43E+09  | 4.03E+08 | 6           |
| P0AFC3 NUOA_ECOLI NADH-quinone oxidoreductase subunit A             | 2        | 17.7                  | 16.457            | 24.272   | 1.9E+09   | 3.8E+08  | 4           |
| P0A8Q3 FRDD_ECOLI Fumarate reductase subunit D                      | 1        | 5.9                   | 13.107            | 3.4712   | 2.17E+09  | 3.62E+08 | 7           |
| P37636 MDTE_ECOLI Multidrug resistance protein MdtE                 | 14       | 50.1                  | 41.19             | 249.02   | 7.96E+09  | 3.62E+08 | 24          |
| P0AG99 SECG_ECOLI Protein-export membrane protein SecG              | 2        | 27.3                  | 11.365            | 24.703   | 2.13E+09  | 3.55E+08 | 4           |
| P0ADN6 YIFL_ECOLI Uncharacterized lipoprotein YifL                  | 2        | 34.3                  | 7.1771            | 49.849   | 1.57E+09  | 3.15E+08 | 8           |
| P0AEH5 ELAB_ECOLI Protein ElaB                                      | 5        | 68.3                  | 11.306            | 7.2983   | 1.84E+09  | 3.07E+08 | 11          |
| P09152 NARG_ECOLI Respiratory nitrate reductase 1 alpha chain       | 84       | 64.2                  | 140.49            | 323.31   | 1.95E+10  | 3E+08    | 182         |
| P0ABA6 ATPG_ECOLI ATP synthase gamma chain                          | 27       | 67.9                  | 31.577            | 323.31   | 4.4E+09   | 2.59E+08 | 62          |
| *P06996 OMPC_ECOLI Outer membrane porin C (OmpC)                    | 1        | 3                     |                   | 0.003663 | 1.1014    | 4732300  | 1           |

**Supplementary Table 4. Cryo-EM data collection, processing, and refinement statistics.**

| Data set                                        | <i>E. coli</i> K12 cell lysate proteins |              |
|-------------------------------------------------|-----------------------------------------|--------------|
|                                                 | KatG                                    | GadB         |
| <b>Data collection and processing</b>           |                                         |              |
| Magnification                                   |                                         | 81,000       |
| Voltage (kV)                                    |                                         | 300          |
| Electron Microscope                             |                                         | Krios-GIF-K3 |
| Defocus range ( $\mu\text{m}$ )                 |                                         | -1.0 to -2.5 |
| Total exposure time (s)                         |                                         | 4.2          |
| Pixel size ( $\text{\AA}$ )                     |                                         | 1.08         |
| Total dose ( $\text{e}^-/\text{\AA}^2$ )        |                                         | 40           |
| Number of frames                                |                                         | 42           |
| Does rate ( $\text{e}^-/\text{phys. Pixel/s}$ ) |                                         | 11.97        |
| No. of initial micrographs                      |                                         | 5,067        |
| No. of initial particles                        |                                         | 3,405,769    |
| No. of final particles                          | 135,241                                 | 30,422       |
| Symmetry                                        | D2                                      | D3           |
| GSFSC Resolution ( $\text{\AA}$ )               | 2.52                                    | 3.59         |
| FSC threshold (0.143)                           |                                         |              |
| Density modification resolution <sup>41</sup>   | 2.17                                    | 2.90         |
| <b>Refinement</b>                               | 2.17                                    | 2.90         |
| Model resolution cut-off ( $\text{\AA}$ )       |                                         |              |
| Model composition                               |                                         |              |
| No. of Protein residues                         | 2,648                                   | 2,562        |
| No. ligands                                     | 4                                       | 0            |
| RMSD <sup>a</sup>                               |                                         |              |
| Bond lengths ( $\text{\AA}$ )                   | 0.002                                   | 0.006        |
| Bond angles ( $^\circ$ )                        | 0.651                                   | 0.970        |
| <b>Validation</b>                               |                                         |              |
| MolProbity score                                | 2.03                                    | 3.13         |
| Ramachandran plot (%)                           |                                         |              |
| Favored (%)                                     | 95.17                                   | 91.45        |
| Allowed (%)                                     | 4.83                                    | 8.55         |
| Disallowed (%)                                  | 0                                       | 0            |
| CC <sup>b</sup> Mask                            | 0.65                                    | 0.73         |

<sup>a</sup>root mean square deviation

<sup>b</sup>correlation coefficient

**Supplementary Table 5. Proteomic analysis of the *E. coli* K12 cell lysate.**

| Uniprot ID Fasta header                                              | Peptides | Sequence coverage [%] | Mol. weight [kDa] | Score  | Intensity | iBAQ     | MS/MS count |
|----------------------------------------------------------------------|----------|-----------------------|-------------------|--------|-----------|----------|-------------|
| P69910 DCEB_ECOLI Glutamate decarboxylase beta (GadB)                | 32       | 67.4                  | 52.668            | 323.31 | 5.74E+10  | 2.39E+09 | 186         |
| P0ACF0 DBHA_ECOLI DNA-binding protein HU-alpha                       | 5        | 61.1                  | 9.5349            | 162.75 | 7.66E+09  | 1.91E+09 | 10          |
| P0A991 ALF1_ECOLI Fructose-bisphosphate aldolase class 1             | 38       | 75.7                  | 38.109            | 323.31 | 3.15E+10  | 1.85E+09 | 108         |
| P0A6Y8 DNAK_ECOLI Chaperone protein DnaK                             | 57       | 81.5                  | 69.114            | 323.31 | 6.14E+10  | 1.75E+09 | 171         |
| P0ABH7 CISY_ECOLI Citrate synthase                                   | 25       | 56.9                  | 48.014            | 323.31 | 3.49E+10  | 1.66E+09 | 60          |
| P13029 KATG_ECOLI Catalase-peroxidase (KatG)                         | 49       | 68.5                  | 80.023            | 323.31 | 4.53E+10  | 1.22E+09 | 130         |
| P09373 PFLB_ECOLI Formate acetyltransferase 1                        | 60       | 66.3                  | 85.356            | 323.31 | 4.01E+10  | 9.54E+08 | 144         |
| P0A6F5 CH60_ECOLI 60 kDa chaperonin                                  | 62       | 74.3                  | 57.328            | 323.31 | 1.75E+10  | 5.66E+08 | 118         |
| P0ADG7 IMDH_ECOLI Inosine-5-monophosphate dehydrogenase              | 25       | 58.4                  | 52.022            | 323.31 | 9.78E+09  | 5.15E+08 | 58          |
| P00957 SYA_ECOLI Alanine--tRNA ligase                                | 58       | 64.5                  | 96.031            | 323.31 | 2.29E+10  | 4.4E+08  | 125         |
| P0A9Y6 CSPC_ECOLI Cold shock-like protein CspC                       | 4        | 78.3                  | 7.4023            | 136.17 | 1.74E+09  | 4.35E+08 | 8           |
| P0AD61 KPYK1_ECOLI Pyruvate kinase I                                 | 26       | 51.5                  | 50.729            | 323.31 | 1.16E+10  | 4.31E+08 | 55          |
| P08312 SYFA_ECOLI Phenylalanine--tRNA ligase alpha subunit           | 24       | 78.9                  | 36.831            | 323.31 | 8.24E+09  | 4.12E+08 | 60          |
| P0A6Z3 HTPG_ECOLI Chaperone protein HtpG                             | 42       | 65.4                  | 71.422            | 323.31 | 1.37E+10  | 3.5E+08  | 73          |
| P68066 GRCA_ECOLI Autonomous glycyl radical cofactor                 | 14       | 70.9                  | 14.284            | 178.54 | 3.19E+09  | 3.19E+08 | 20          |
| P07395 SYFB_ECOLI Phenylalanine--tRNA ligase beta subunit            | 32       | 44.3                  | 87.377            | 323.31 | 1.02E+10  | 2.69E+08 | 61          |
| P0AEJ6 EUTB_ECOLI Ethanolamine ammonia-lyase heavy chain             | 6        | 12.4                  | 49.403            | 49.133 | 5.48E+09  | 2.61E+08 | 6           |
| P69908 DCEA_ECOLI Glutamate decarboxylase alpha                      | 31       | 67.2                  | 52.685            | 42.178 | 6.2E+09   | 2.58E+08 | 7           |
| P0A9G6 ACEA_ECOLI Isocitrate lyase                                   | 18       | 52.8                  | 47.521            | 323.31 | 5.34E+09  | 2.43E+08 | 36          |
| P31057 PANB_ECOLI 3-methyl-2-oxobutanoate hydroxymethyltransferase   | 8        | 41.3                  | 28.237            | 132.91 | 1.66E+09  | 2.38E+08 | 11          |
| P76143 LSRF_ECOLI 3-hydroxy-5-phosphonooxypentane-2,4-dione thiolase | 15       | 50.2                  | 31.892            | 306.48 | 3.72E+09  | 2.19E+08 | 31          |
| P0ABB4 ATPB_ECOLI ATP synthase subunit beta                          | 22       | 68.9                  | 50.325            | 323.31 | 5.21E+09  | 2.17E+08 | 42          |
| P0AC38 ASPA_ECOLI Aspartate ammonia-lyase                            | 16       | 39.7                  | 52.356            | 323.31 | 4.87E+09  | 2.12E+08 | 35          |
| P0AD33 YFCZ_ECOLI UPF0381 protein YfcZ                               | 2        | 27.7                  | 10.318            | 26.966 | 9.93E+08  | 1.99E+08 | 3           |
| P0A9P0 DLDH_ECOLI Dihydrolipoyl dehydrogenase                        | 23       | 50                    | 50.688            | 323.31 | 4.18E+09  | 1.9E+08  | 36          |

## References

41. Terwilliger, T. C., Ludtke, S. J., Read, R. J., Adams, P. D. & Afonine, P. V. Improvement of cryo-EM maps by density modification. *Nature methods* **17**, 923-927 (2020).
